# Supplementary material
Source: Springer Nature journal article supplement (https://www.springermedizin.de/resource/supplementary/12882_2013_719_MOESM5_ESM.pdf/9454446)

**Patient A** is in relatively good health and is new to dialysis – of your last 100 patients who fit this profile, how would you recommend treating these patients today?

- ICHD
- Currently available HHD systems
- PD
- Self-care HD (France only)

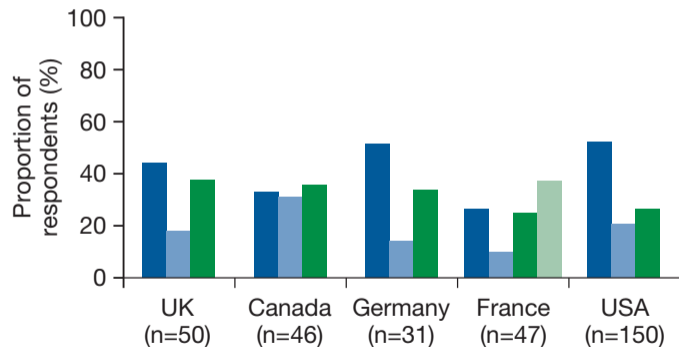

n = number of respondents per country

**Patient B** has relatively poor health and is already on ICHD – of your last 100 patients who fit this profile, what dialysis modality would you expect these patients to be using 1 year from now?

- Remain on ICHD
- Switch to currently available HHD systems
- Switch to PD
- Switch to self-care HD (France only)

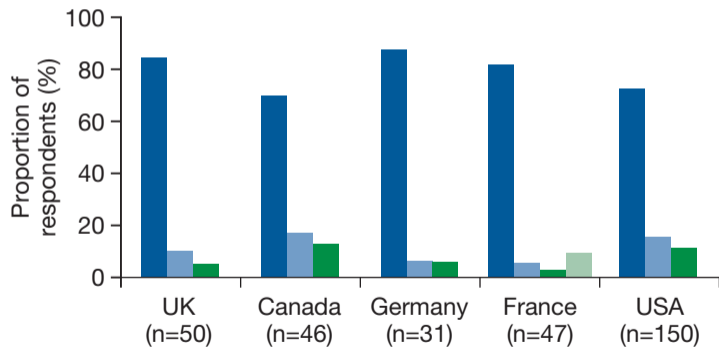

Supplement: MOESM5 [file 9454446]
